# Supplementary material
Source: PubMed Central journal article supplement (PMC5791542)
Supplement: NIHMS920173-supplement-Supplemental_Material.pdf [file NIHMS920173-supplement-Supplemental_Material.pdf]

## Supplement Material

**Supplemental Table I:** Primers sequences used in RT-PCR. F = forward, R = reverse

| Gene                | Primers (5'-3') |                         | Access Number |
|---------------------|-----------------|-------------------------|---------------|
| <i>Tnfa</i>         | F               | CCACCACGCTCTTCTGTCTAC   | NM_013693.3   |
|                     | R               | AGGGTCTGGGCCATAGAACT    |               |
| <i>Il6</i>          | F               | TGATGCACTTGCAGAAAACA    | NM_031168.2   |
|                     | R               | ACCAGAGGAAATTTTCAATAGGC |               |
| <i>Vcam1</i>        | F               | CCGGCATATACGAGTGTGAA    | NM_011693.3   |
|                     | R               | TCGGGCGAAAAATAGTCCT     |               |
| <i>Ccr7</i>         | F               | CAAACAGGAGCTGATGTCCA    | NM_007719.2   |
|                     | R               | GTCTCTCTCCAGCTAGCCCA    |               |
| <i>Cxcl10</i>       | F               | CTCATCCTGCTGGGTCTGAG    | NM_021274.2   |
|                     | R               | CCTATGGCCCTCATTCTCAC    |               |
| <i>Inos (Nos2)</i>  | F               | TGAAGAAAACCCCTTGTGCT    | NM_010927.4   |
|                     | R               | TTCTGTGCTGTCCCAGTGAG    |               |
| <i>Arg2</i>         | F               | AGAAGCTGGCTTGCTGAAGA    | NM_009705.3   |
|                     | R               | AGGGATCATCTTGTGGGACA    |               |
| <i>Ccl17</i>        | F               | TGCTTCTGGGGACTTTTCTG    | NM_011332.3   |
|                     | R               | ATAGGAATGGCCCCTTTGAA    |               |
| <i>Cd206 (Mrc1)</i> | F               | TGGCATGTCCTGGAATGAT     | NM_008625.2   |
|                     | R               | CAGGTGTGGGCTCAGGTAGT    |               |

## Supplemental Figures

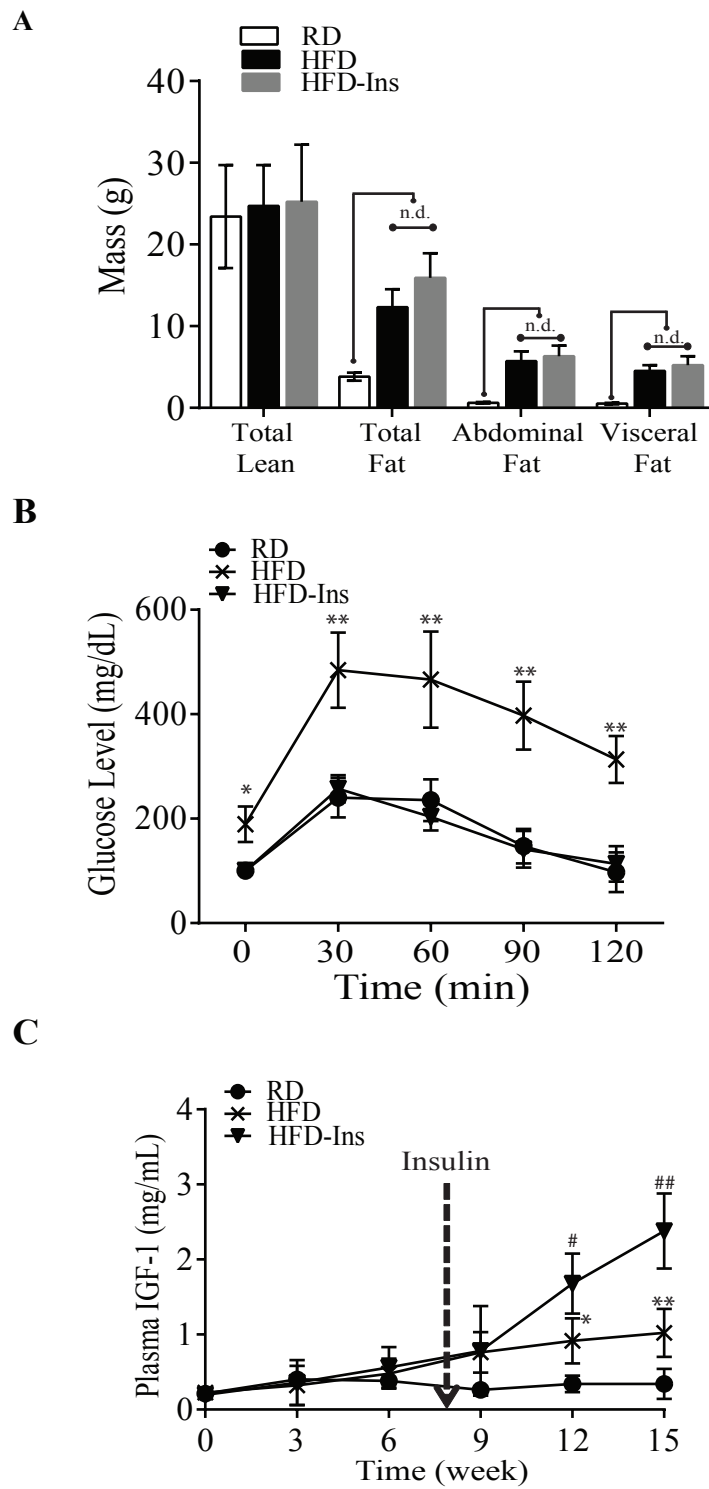

**Supplemental Figure I.** (A) Fat mass (Total, Abdominal and Visceral) (B) Glucose tolerance test (IPGTT) (C) Time course of plasma fasting IGF-1 levels.

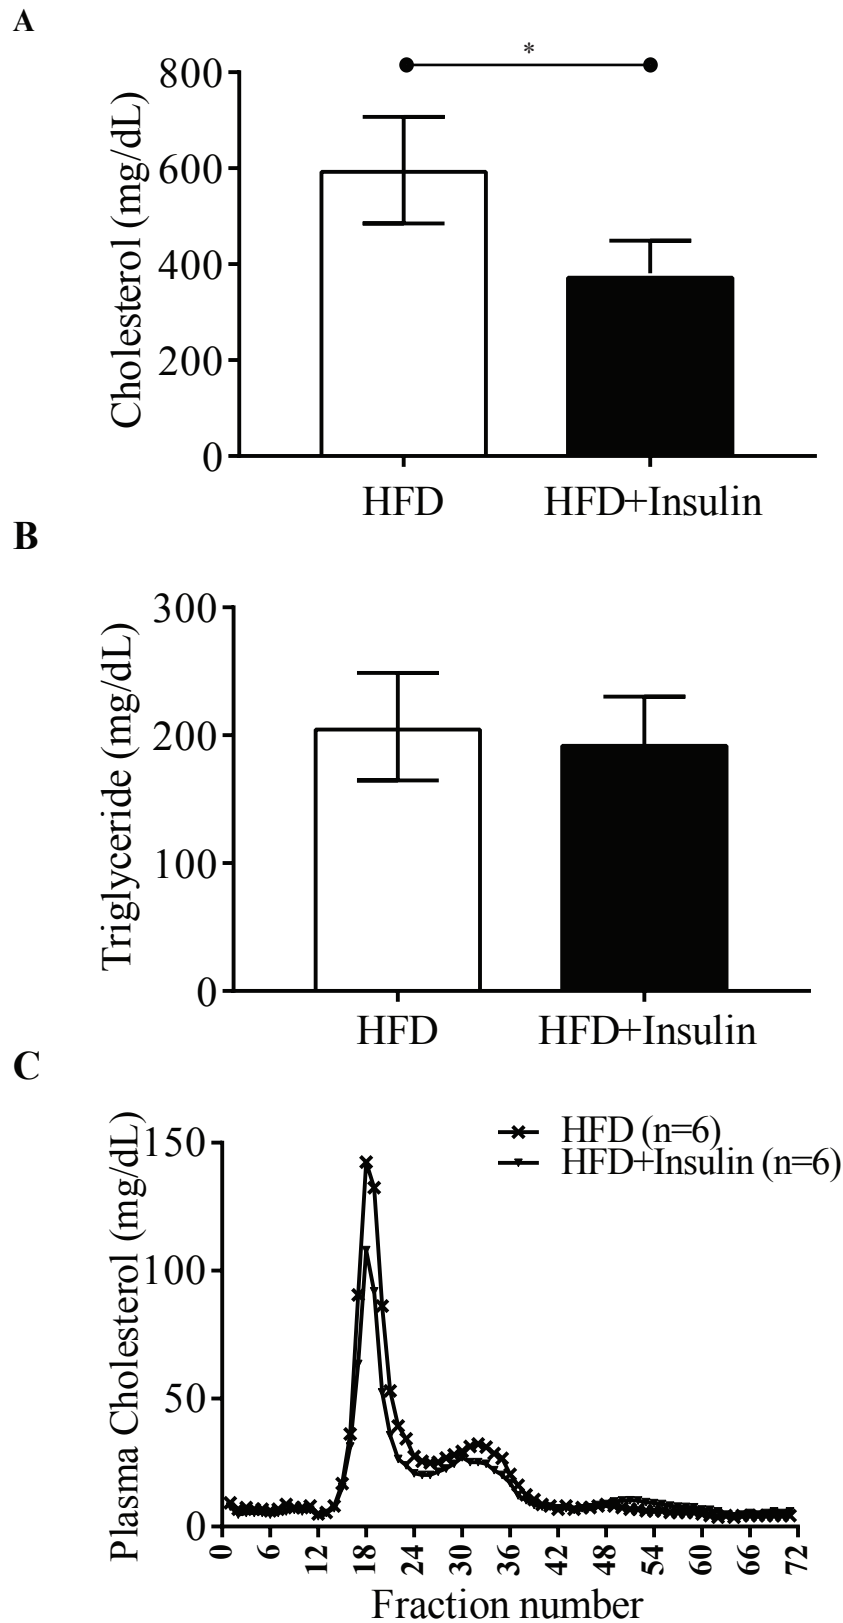

**Supplemental Figure II.** (A and B) Total plasma cholesterol (A) and triglycerides (B) of HFD-fed control and insulin treated ApoE<sup>-/-</sup> mice (C) fast performance liquid chromatography gel-filtration for cholesterol concentration.

**A**

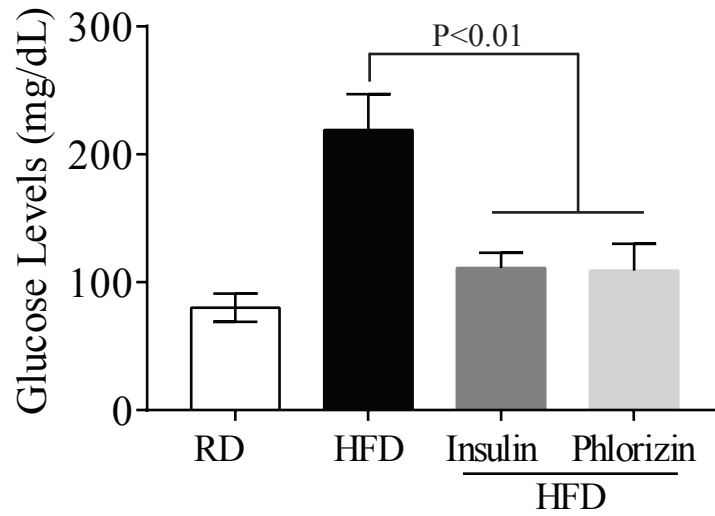

**B**

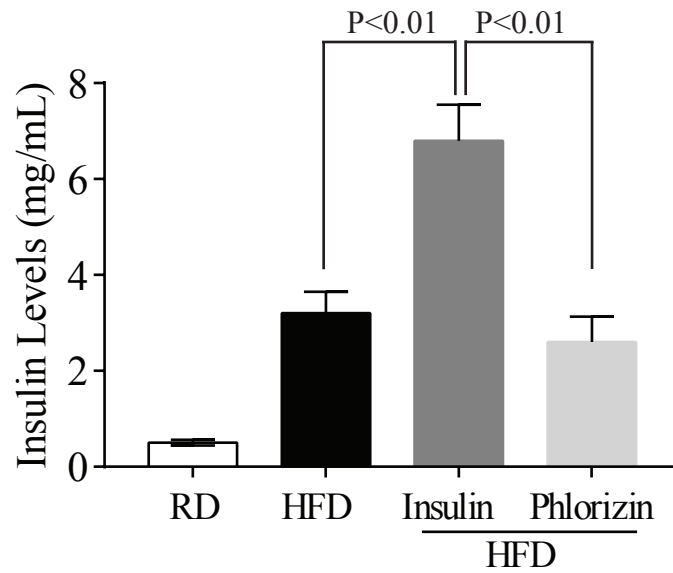

**Supplemental Figure III.** (A and B) Fasting plasma glucose (A) and insulin (B) measurements from control and HFD-fed control, Phlorizin and insulin treated ApoE<sup>-/-</sup> mice.

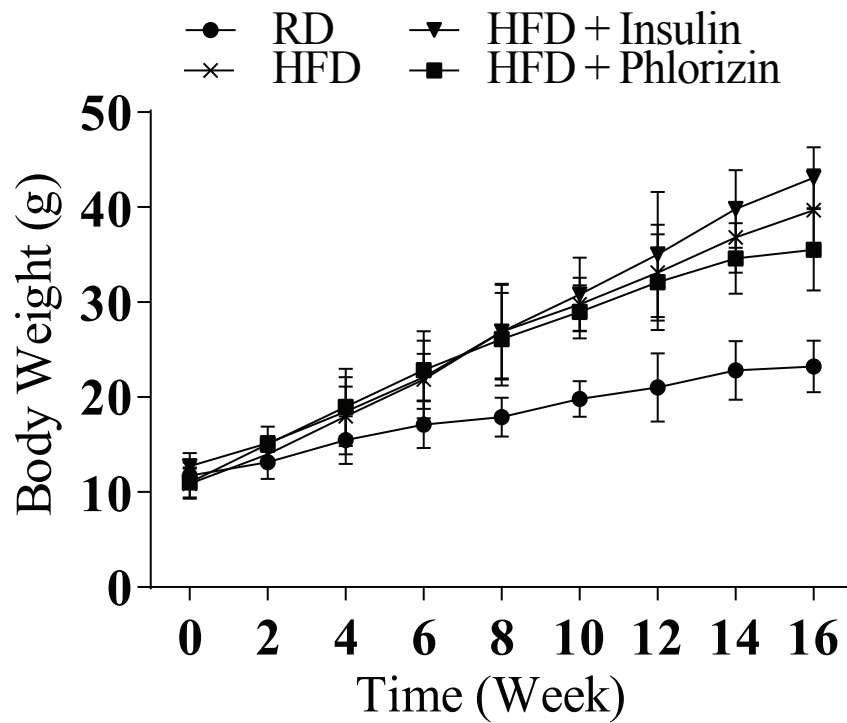

**Supplemental Figure IV.** Body weights of experimental animals during HFD feeding on insulin or Phlorizin-treated ApoE<sup>-/-</sup> mice.

**A**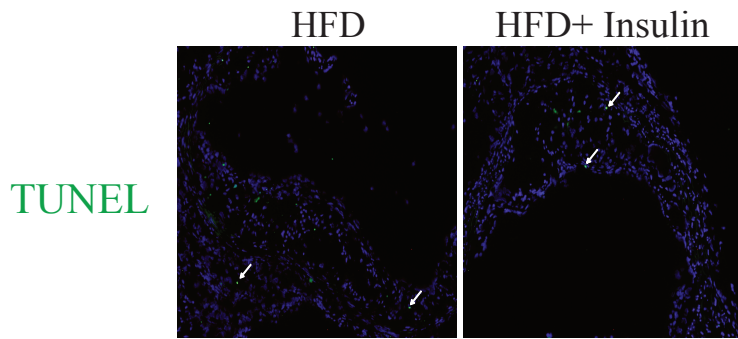**B**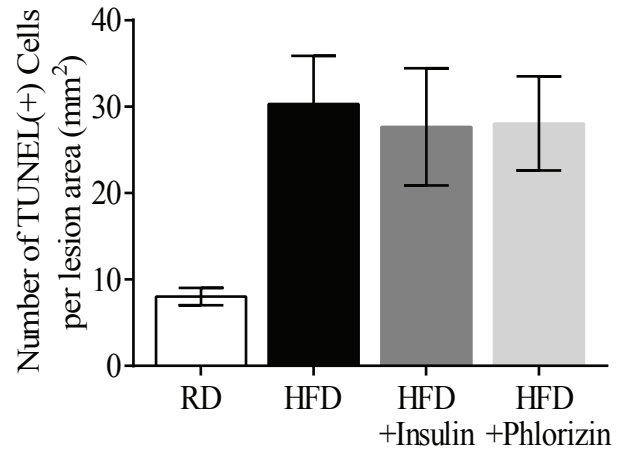**C**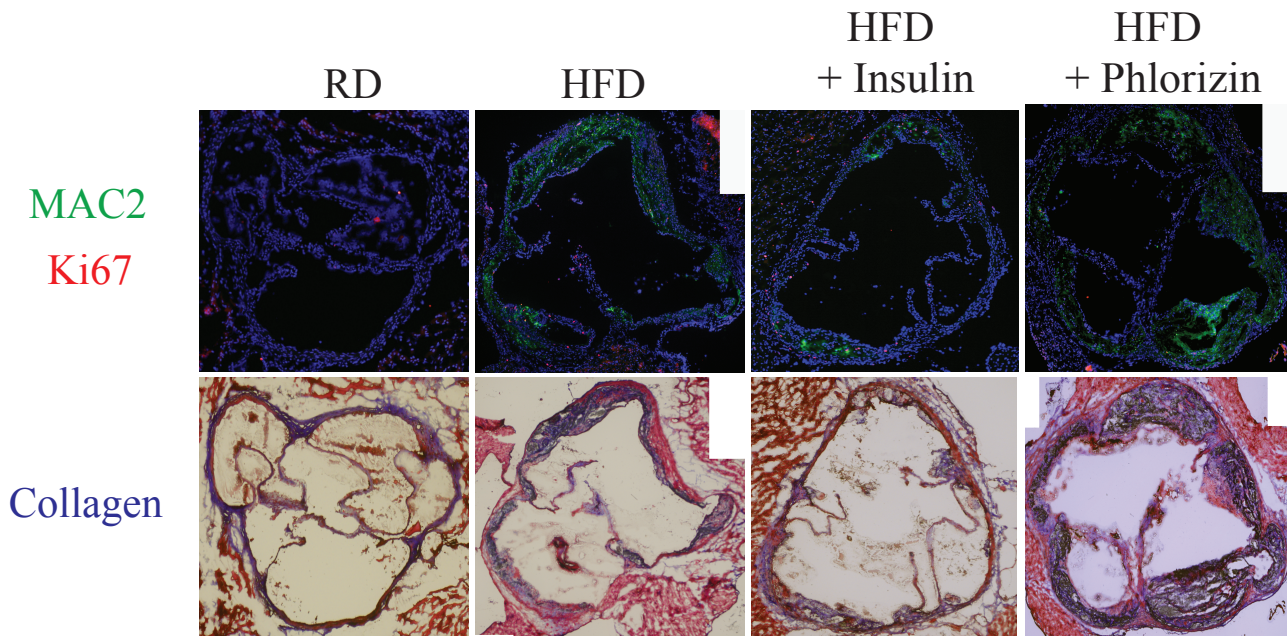**D**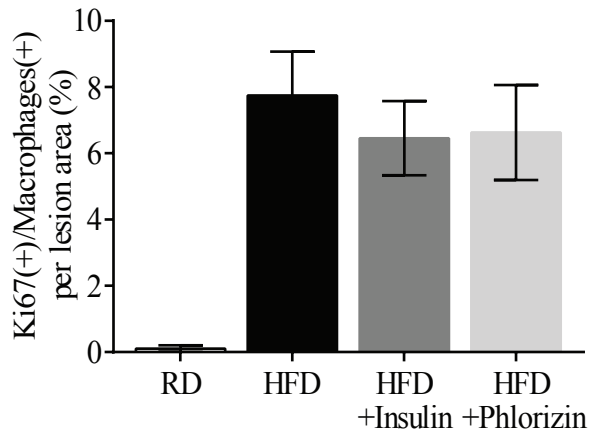

**Supplemental Figure V.** (A-B) Ki67 staining and quantification of macrophage proliferation (B). (C and D) TUNEL staining (C) and quantification of apoptosis (D).

**A**

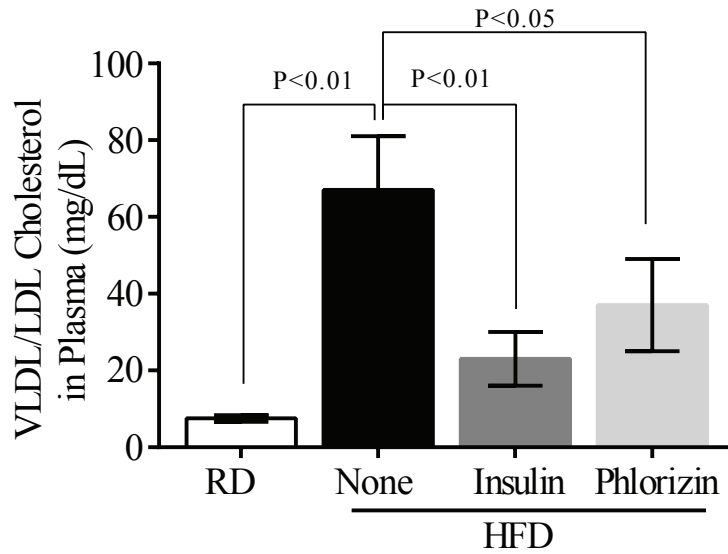

**B**

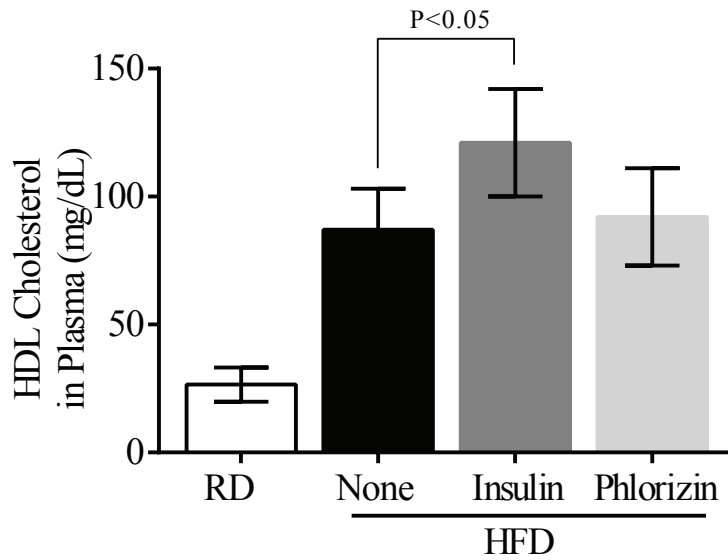

**Supplemental Figure VI.** (A and B) Plasma levels of VLDL/LDL (A) and HDL (B) from control and insulin or phlorizin treated HFD-ApoE<sup>-/-</sup> mice.

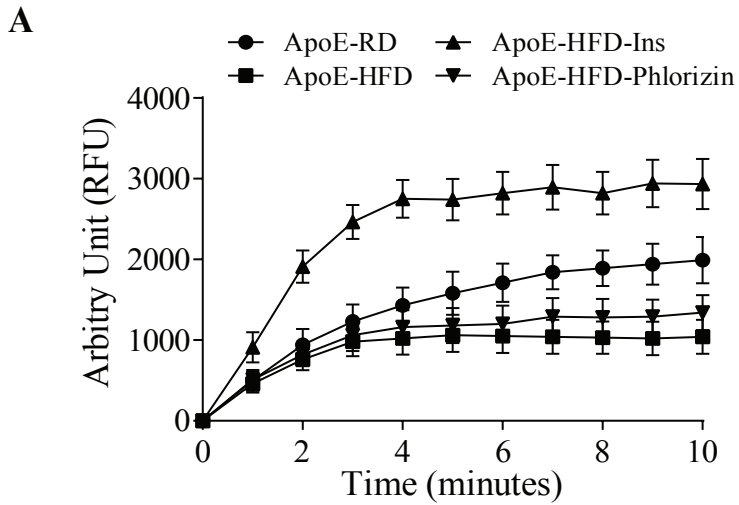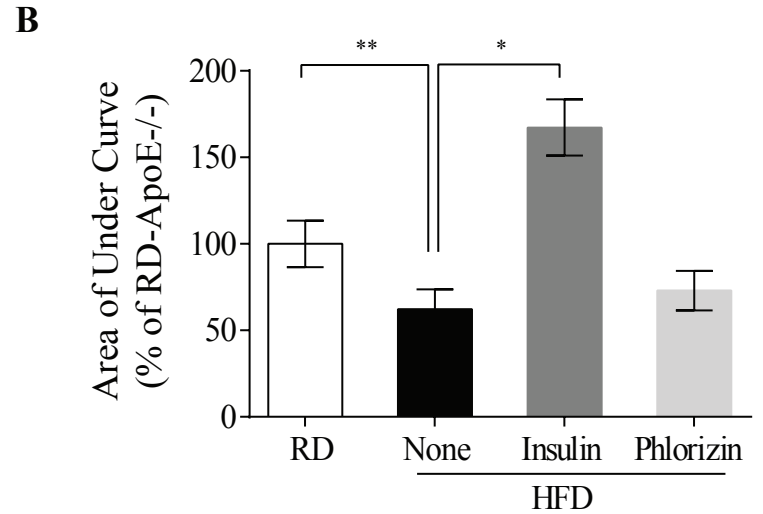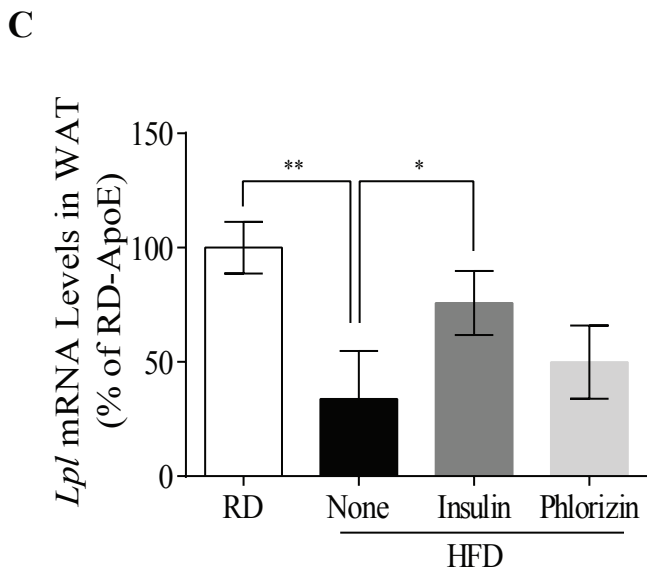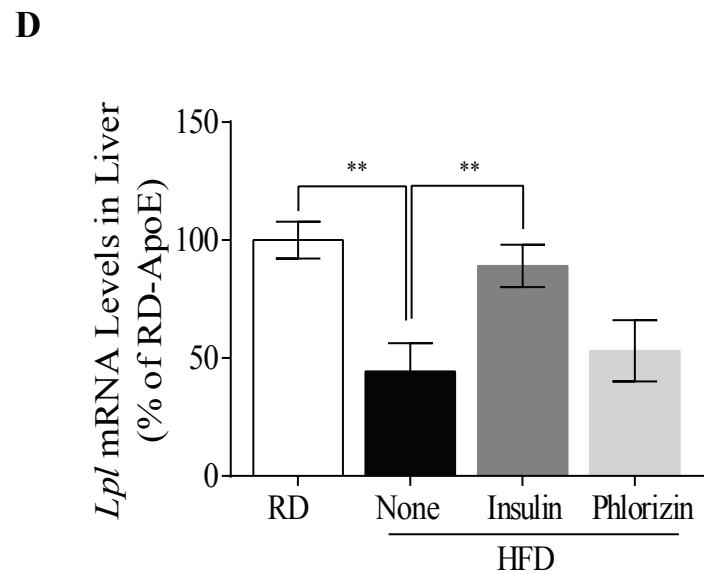

**Supplemental Figure VII.** (A and B) Time course of plasma LPL activity and quantification of activity (AUC) in control and insulin or phlorizin treated HFD-ApoE<sup>-/-</sup> mice. (C and D) level of *Lpl* mRNA in WAT (C) and liver (D).



**A**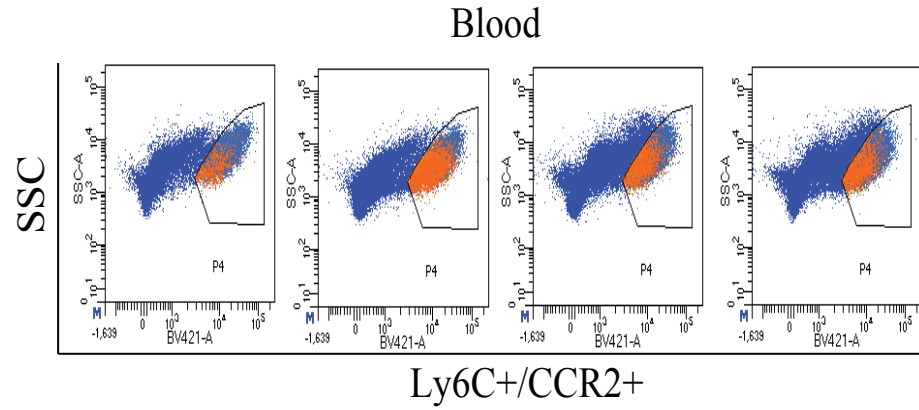**B**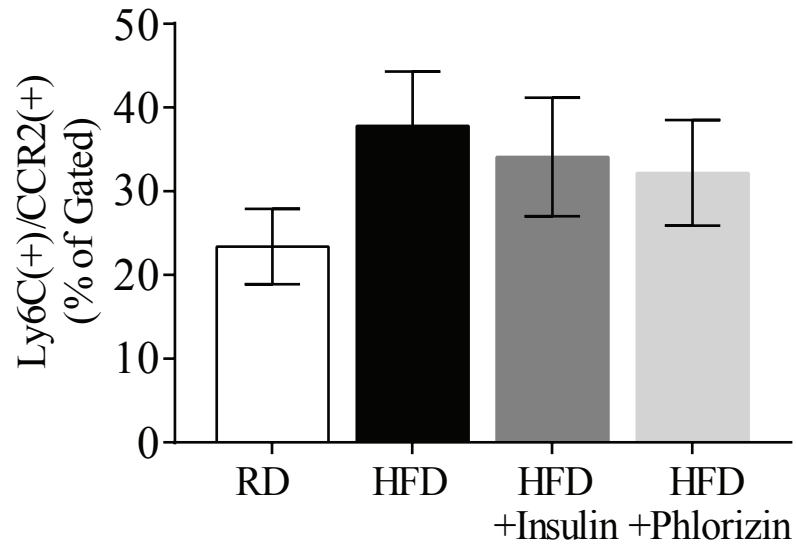

**Supplemental Figure VIII.** (A) Circulating Ly6C+/CCR2+ monocyte levels in blood from control and insulin or phlorizin treated HFD-ApoE<sup>-/-</sup> mice. (B) Quantification of FACS analysis.

**A**

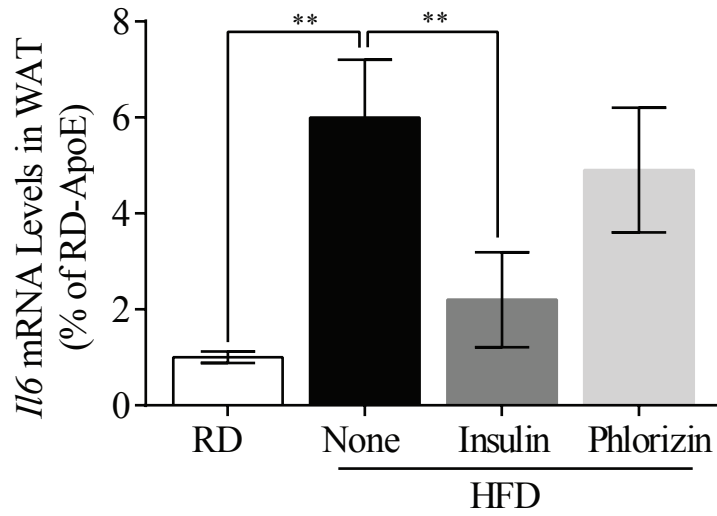

**B**

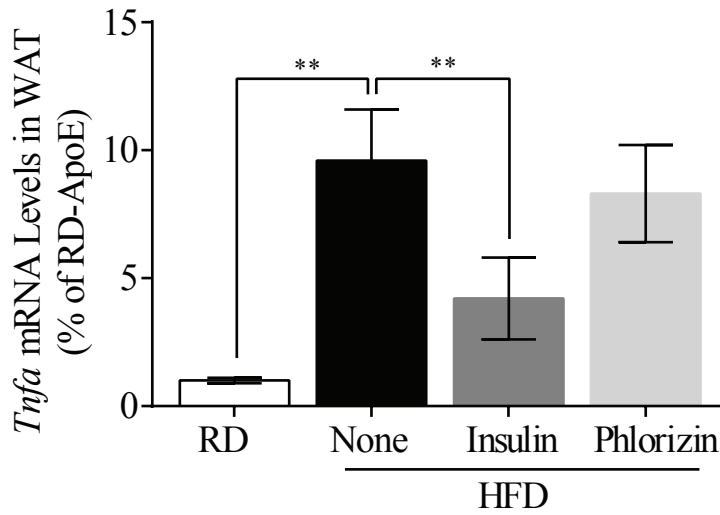

**Supplemental Figure IX.** (A and B) *Tnfa* (A) and *Il6* (B) mRNA expressions in subcutaneous WAT from control and insulin or phlorizin treated HFD-ApoE<sup>-/-</sup> mice.

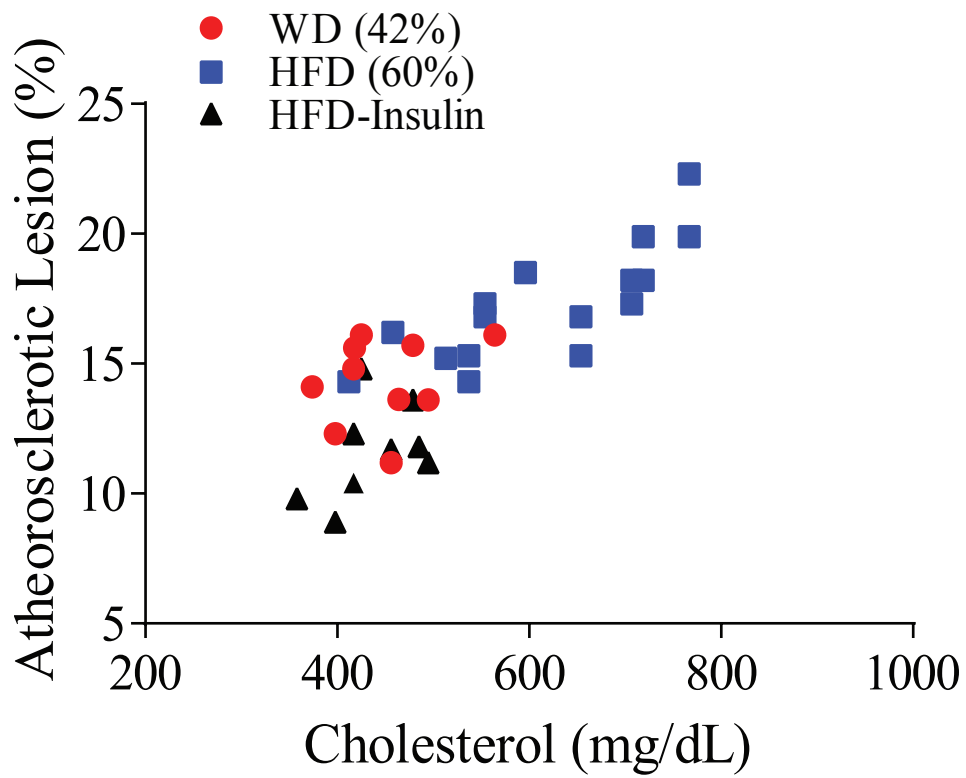

**Supplemental Figure X.** Correlations between plasma cholesterol levels and atherosclerosis events.
